# Supplementary material for: Cytokine Dysregulation inMECP2- andCDKL5-Related Rett Syndrome: Relationships with Aberrant Redox Homeostasis, Inflammation, andω-3 PUFAs
Source: Hindawi journal article supplement (doi:10.1155/2015/421624), 2015-01-01
Supplement: f1 [file 421624.f1.pdf]

**Supplementary Table 1.** Changes (folds vs. controls) for inflammatory status, circulating cytokines, and redox status in *MECP2*- and *CDKL5*- mutated Rett patients.

|                              | <i>MECP2</i> -mutated<br>Rett patients | <i>CDKL5</i> -mutated<br>Rett patients |
|------------------------------|----------------------------------------|----------------------------------------|
| <i>Inflammatory status</i>   |                                        |                                        |
| ESR                          | <b>3.31 ± 1.77</b>                     | 1.52 ± 0.48                            |
| <i>Circulating cytokines</i> |                                        |                                        |
| TNF- $\alpha$                | <b>7.51 ± 2.32</b>                     | <b>4.56 ± 1.73</b>                     |
| IFN- $\gamma$                | <b>0.63 ± 0.22</b>                     | <b>1.80 ± 1.12</b>                     |
| IL-1 $\beta$                 | 0.96 ± 0.41                            | <b>3.41 ± 1.45</b>                     |
| IL-12p70                     | 0.00066 ± 0.00037                      | 3.15 ± 0.54                            |
| IL-4                         | <b>3.00 ± 0.38</b>                     | <b>0.69 ± 0.49</b>                     |
| IL-5                         | <b>1.05 ± 0.09</b>                     | <b>1.14 ± 0.04</b>                     |
| IL-6                         | <b>2.82 ± 1.00</b>                     | <b>1.75 ± 1.83</b>                     |
| IL-10                        | 0.70 ± 0.95                            | <b>21.22 ± 2.79</b>                    |
| IL-13                        | 1.17 ± 0.79                            | <b>4.56 ± 1.60</b>                     |
| IL-33                        | <b>6.28 ± 1.94</b>                     | <b>4.57 ± 1.72</b>                     |
| IL-17A                       | <b>3.00 ± 1.12</b>                     | <b>0.30 ± 0.25</b>                     |
| IL-22                        | <b>0.46 ± 0.13</b>                     | 1.10 ± 0.16                            |
| TGF- $\beta$ 1               | <b>0.94 ± 0.12</b>                     | <b>1.14 ± 0.03</b>                     |
| IL-37                        | <b>4.25 ± 1.33</b>                     | <b>3.16 ± 1.61</b>                     |
| IL-8                         | <b>1.63 ± 0.62</b>                     | <b>1.40 ± 0.72</b>                     |
| IP-10                        | <b>0.69 ± 0.12</b>                     | <b>0.71 ± 0.12</b>                     |
| I-TAC                        | <b>0.47 ± 0.11</b>                     | <b>0.40 ± 0.14</b>                     |
| RANTES                       | <b>0.86 ± 0.09</b>                     | 0.95 ± 0.06                            |
| <i>Th2/Th1 ratio</i>         |                                        |                                        |
| IL-4 / IFN- $\gamma$         | <b>3.99 ± 2.14</b>                     | 0.60 ± 0.37                            |
| IL-5 / IFN- $\gamma$         | <b>1.79 ± 0.72</b>                     | 0.81 ± 0.50                            |

|                              |                                     |                                     |
|------------------------------|-------------------------------------|-------------------------------------|
| IL-6 / IFN- $\gamma$         | <b>4.87 <math>\pm</math> 1.59</b>   | 1.28 $\pm$ 1.14                     |
| IL-10 / IFN- $\gamma$        | 1.10 $\pm$ 1.04                     | <b>8.13 <math>\pm</math> 5.64</b>   |
| IL-4 / TNF- $\alpha$         | 0.26 $\pm$ 1.14                     | 0.27 $\pm$ 0.25                     |
| IL-5 / TNF- $\alpha$         | 0.14 $\pm$ 0.08                     | 1.17 $\pm$ 1.15                     |
| IL-6 / TNF- $\alpha$         | 0.10 $\pm$ 0.06                     | 3.17 $\pm$ 3.06                     |
| IL-10 / TNF- $\alpha$        | 0.12 $\pm$ 0.09                     | 20.96 $\pm$ 6.85                    |
| <i>OS markers</i>            |                                     |                                     |
| P-NPBI                       | <b>2.57 <math>\pm</math> 0.69</b>   | <b>2.53 <math>\pm</math> 0.31</b>   |
| IE-NPBI                      | <b>2.08 <math>\pm</math> 0.82</b>   | <b>1.89 <math>\pm</math> 0.38</b>   |
| F <sub>2</sub> -IsoPs        | <b>3.58 <math>\pm</math> 0.82</b>   | <b>3.44 <math>\pm</math> 0.68</b>   |
| F <sub>4</sub> -NeuroPs      | <b>17.47 <math>\pm</math> 2.12</b>  | <b>4.64 <math>\pm</math> 1.02</b>   |
| F <sub>2</sub> -dihomo-IsoPs | <b>34.67 <math>\pm</math> 3.56</b>  | 0.73 $\pm$ 0.51                     |
| GSH/GSSG ratio               | <b>0.051 <math>\pm</math> 0.002</b> | <b>0.070 <math>\pm</math> 0.005</b> |

Data are expressed as folds vs. healthy subjects values and indicated as means  $\pm$  standard deviations. Value  $< 1$  indicates a decrease in the examined variables (*i.e.*, inflammatory markers, cytokine production, OS markers) whereas value  $> 1$  indicates an increase in the examined variables. Bold characters indicate statistical significance ( $P < 0.05$ ). ESR: erythrocyte sedimentation rate; P-NPBI: plasma non-protein-bound iron; F<sub>2</sub>-IsoPs: plasma F<sub>2</sub>-isoprostanes; F<sub>2</sub>-dihomo-IsoPs: plasma F<sub>2</sub>-dihomo-isoprostanes; F<sub>4</sub>-NeuroPs: F<sub>4</sub>-neuroprostanes; GSH: reduced glutathione; GSSG: oxidized glutathione.

**Supplementary Table 2.** Changes for clinical severity, inflammatory status, circulating cytokines, and redox status in *MECP2*- and *CDKL5*- mutated Rett patients after  $\omega$ -3 PUFAs supplementation.

|                              | <i>MECP2</i> -mutated<br>Rett patients | <i>CDKL5</i> -mutated<br>Rett patients |
|------------------------------|----------------------------------------|----------------------------------------|
| <i>Clinical severity</i>     |                                        |                                        |
| CCSS [46]                    | <b>0.77 ± 0.4</b>                      | <b>0.63 ± 0.2</b>                      |
| <i>Inflammatory status</i>   |                                        |                                        |
| ESR                          | <b>0.57 ± 0.24</b>                     | 0.54 ± 0.39                            |
| <i>Circulating cytokines</i> |                                        |                                        |
| TNF- $\alpha$                | <b>0.072 ± 0.12</b>                    | <b>0.00013 ± 0.00001</b>               |
| IFN- $\gamma$                | <b>1.81 ± 0.53</b>                     | <b>0.99 ± 0.30</b>                     |
| IL-1 $\beta$                 | 1.10 ± 0.55                            | <b>0.97 ± 0.13</b>                     |
| IL-12p70                     | <b>277 ± 8.58</b>                      | N.A.                                   |
| IL-4                         | <b>0.41 ± 0.08</b>                     | <b>2.14 ± 0.45</b>                     |
| IL-5                         | <b>1.02 ± 0.05</b>                     | <b>0.94 ± 0.11</b>                     |
| IL-6                         | <b>1.46 ± 0.75</b>                     | 2.36 ± 0.95                            |
| IL-10                        | 3.69 ± 3.0                             | <b>0.49 ± 0.22</b>                     |
| IL-13                        | <b>2.93 ± 1.87</b>                     | <b>0.13 ± 0.10</b>                     |
| IL-33                        | <b>1.23 ± 0.63</b>                     | N.A.                                   |
| IL-17A                       | <b>0.39 ± 0.23</b>                     | 0.004 ± 0.009                          |
| IL-22                        | <b>2.19 ± 0.31</b>                     | N.A.                                   |
| TGF- $\beta$ 1               | <b>1.01 ± 0.08</b>                     | 1.19 ± 0.01                            |
| IL-37                        | <b>0.60 ± 0.23</b>                     | <b>1.02 ± 0.01</b>                     |
| IL-8                         | <b>0.64 ± 0.38</b>                     | <b>0.0037 ± 0.0004</b>                 |
| IP-10                        | <b>1.25 ± 0.36</b>                     | 0.44 ± 0.15                            |
| I-TAC                        | <b>1.93 ± 0.51</b>                     | <b>2.03 ± 0.94</b>                     |
| RANTES                       | <b>0.94 ± 0.09</b>                     | 1.05 ± 0.02                            |

| <i>Th2/Th1 ratio</i>         |                                    |                                   |
|------------------------------|------------------------------------|-----------------------------------|
| IL-4 / IFN- $\gamma$         | <b>0.27 <math>\pm</math> 0.18</b>  | <b>2.16 <math>\pm</math> 1.17</b> |
| IL-5 / IFN- $\gamma$         | <b>0.60 <math>\pm</math> 0.40</b>  | 0.93 $\pm$ 0.62                   |
| IL-6 / IFN- $\gamma$         | <b>0.88 <math>\pm</math> 0.69</b>  | 1.96 $\pm$ 1.20                   |
| IL-10 / IFN- $\gamma$        | <b>2.15 <math>\pm</math> 2.10</b>  | <b>0.43 <math>\pm</math> 0.27</b> |
| IL-4 / TNF- $\alpha$         | <b>3.12 <math>\pm</math> 2.49</b>  | <b>6.0 <math>\pm</math> 1.26</b>  |
| IL-5 / TNF- $\alpha$         | <b>8.23 <math>\pm</math> 3.99</b>  | 4.65 $\pm$ 0.55                   |
| IL-6 / TNF- $\alpha$         | <b>45.73 <math>\pm</math> 11.2</b> | 6.32 $\pm$ 2.55                   |
| IL-10 / TNF- $\alpha$        | 39.39 $\pm$ 11.3                   | 1.83 $\pm$ 0.80                   |
| <i>OS markers</i>            |                                    |                                   |
| P-NPBI                       | <b>0.52 <math>\pm</math> 0.08</b>  | <b>0.66 <math>\pm</math> 0.01</b> |
| IE-NPBI                      | <b>0.54 <math>\pm</math> 0.07</b>  | <b>0.47 <math>\pm</math> 0.03</b> |
| F <sub>2</sub> -IsoPs        | <b>0.51 <math>\pm</math> 0.14</b>  | <b>0.45 <math>\pm</math> 0.08</b> |
| F <sub>4</sub> -NeuroPs      | <b>0.29 <math>\pm</math> 0.08</b>  | <b>1.05 <math>\pm</math> 0.06</b> |
| F <sub>2</sub> -dihomo-IsoPs | <b>0.13 <math>\pm</math> 0.12</b>  | 6.62 $\pm$ 3.49                   |
| GSH/GSSG ratio               | <b>2.17 <math>\pm</math> 0.09</b>  | <b>0.86 <math>\pm</math> 0.55</b> |

Data are expressed as folds vs. basal levels (*i.e.*, untreated *MECP2*- and *CDKL5*-mutated Rett patients) and indicated as means  $\pm$  standard deviations. Value  $< 1$  indicates a decrease in the examined variables (*i.e.*, inflammatory markers, cytokine production, OS markers) whereas value  $> 1$  indicates an increase in the examined variables. Bold characters indicate statistical significance ( $P < 0.05$ ). CCSS: compressed clinical severity score [46]; ESR: erythrocyte sedimentation rate; P-NPBI: plasma non-protein-bound iron; F<sub>2</sub>-IsoPs, plasma F<sub>2</sub>-isoprostanes; F<sub>2</sub>-dihomo-IsoPs: plasma F<sub>2</sub>-dihomo-isoprostanes; F<sub>4</sub>-NeuroPs: F<sub>4</sub>-neuroprostanes; GSH: reduced glutathione; GSSG: oxidized glutathione; N.A.: not applicable.
